# Supplementary material
Source: PubMed Central journal article supplement (PMC5466506)
Supplement: NIHMS856086-supplement-supplement_1.pdf [file NIHMS856086-supplement-supplement_1.pdf]

753 **Supplemental Materials**

754

755 **Supplemental Table 1.** Micro-computed tomography measures of cancellous and cortical bone

756 and whole bone mechanical testing measures are shown.

|                   | Measure                                         | Wild Type        |                               | TLR5KO                       |                                   |
|-------------------|-------------------------------------------------|------------------|-------------------------------|------------------------------|-----------------------------------|
|                   |                                                 | Untreated        | $\Delta$ Microbiota           | Untreated                    | $\Delta$ Microbiota               |
| Proximal Tibia    | Bone Volume Fraction                            | 0.15 $\pm$ 0.02  | 0.15 $\pm$ 0.03               | 0.15 $\pm$ 0.01              | 0.13 $\pm$ 0.01                   |
|                   | Trabecular Thickness ( $\mu\text{m}$ )          | 44.70 $\pm$ 1.98 | 43.30 $\pm$ 5.63              | 41.30 $\pm$ 2.66             | 36.40 $\pm$ 2.13 <sup>#, \$</sup> |
|                   | Trabecular Separation ( $\mu\text{m}$ )         | 197 $\pm$ 14     | 191 $\pm$ 11                  | 187 $\pm$ 7                  | 176 $\pm$ 7 <sup>\$</sup>         |
|                   | Cortical TMD (mg HA/cm <sup>3</sup> )           | 999 $\pm$ 10     | 979 $\pm$ 8 <sup>*</sup>      | 997 $\pm$ 13                 | 981 $\pm$ 7 <sup>#</sup>          |
|                   | Growth Plate Thickness ( $\mu\text{m}$ )        | 558 $\pm$ 46     | 562 $\pm$ 41                  | 550 $\pm$ 54                 | 526 $\pm$ 21                      |
| Femoral Diaphysis | Cortical Area (mm <sup>2</sup> )                | 0.87 $\pm$ 0.07  | 0.82 $\pm$ 0.10               | 0.96 $\pm$ 0.07 <sup>a</sup> | 0.67 $\pm$ 0.05 <sup>#, \$</sup>  |
|                   | Marrow Area (mm <sup>2</sup> )                  | 1.06 $\pm$ 0.07  | 1.17 $\pm$ 0.10               | 1.17 $\pm$ 0.15              | 0.99 $\pm$ 0.08 <sup>#, \$</sup>  |
|                   | Total Area (mm <sup>2</sup> )                   | 1.93 $\pm$ 0.13  | 1.98 $\pm$ 0.18               | 2.13 $\pm$ 0.17 <sup>a</sup> | 1.66 $\pm$ 0.08 <sup>#, \$</sup>  |
|                   | Cortical Thickness ( $\mu\text{m}$ )            | 210 $\pm$ 10     | 189 $\pm$ 17 <sup>*</sup>     | 220 $\pm$ 14 <sup>a</sup>    | 170 $\pm$ 12 <sup>#, \$</sup>     |
|                   | Moment of Inertia (mm <sup>4</sup> )            | 0.15 $\pm$ 0.02  | 0.15 $\pm$ 0.03               | 0.18 $\pm$ 0.03 <sup>a</sup> | 0.10 $\pm$ 0.01 <sup>#, \$</sup>  |
|                   | Minimum Moment of Inertia/ c (mm <sup>3</sup> ) | 0.22 $\pm$ 0.03  | 0.22 $\pm$ 0.03               | 0.25 $\pm$ 0.03 <sup>a</sup> | 0.16 $\pm$ 0.01 <sup>#, \$</sup>  |
| Whole Femur       | Length (mm)                                     | 16.05 $\pm$ 0.21 | 16.15 $\pm$ 0.24              | 15.88 $\pm$ 0.26             | 15.61 $\pm$ 0.14 <sup>#, \$</sup> |
|                   | Peak Bending Moment (N*mm)                      | 41.09 $\pm$ 2.84 | 37.32 $\pm$ 2.86 <sup>*</sup> | 40.47 $\pm$ 3.00             | 29.43 $\pm$ 1.87 <sup>#, \$</sup> |
|                   | Bending Stiffness (N/mm)                        | 194 $\pm$ 18     | 177 $\pm$ 21                  | 195 $\pm$ 38                 | 143 $\pm$ 10 <sup>#</sup>         |

|  |                              |             |             |             |             |
|--|------------------------------|-------------|-------------|-------------|-------------|
|  | Post Yield Displacement (mm) | 0.31 ± 0.12 | 0.32 ± 0.08 | 0.27 ± 0.11 | 0.34 ± 0.10 |
|--|------------------------------|-------------|-------------|-------------|-------------|

757 Values are mean ± SD. TMD=Tissue mineral density

758 \*WT-ΔMicrobiota v. WT-untreated, p<0.05

759 #TLR5KO-ΔMicrobiota v. TLR5KO-untreated, p<0.05

760 <sup>a</sup>TL5KO-untreated v. WT-untreated, p<0.05

761 <sup>s</sup>TLR5KO-ΔMicrobiota v. WT-ΔMicrobiota, p<0.05

762

763
